# Supplementary material for: Reversible morphological switching and deformation hysteresis in electric field mediated instability of thin elastic films
Source: Royal Society of Chemistry journal article supplement (doi:10.1039/c8sm02622j), 2019-01-01
Supplement: c8sm02622j1.pdf [file c8sm02622j1.pdf]

## Reversible Morphological Switching and Deformation Hysteresis in Electric Field Mediated Instability of Thin Elastic Films

Sumita Sahoo<sup>1</sup>, Nandini Bhandaru<sup>2</sup> and Rabibrata Mukherjee<sup>1\*</sup>

<sup>1</sup>Instability and Soft Patterning Laboratory, Department of Chemical Engineering  
Indian Institute of Technology Kharagpur, West Bengal, Pin 721302, India

<sup>2</sup>Department of Chemical Engineering, BITS Pilani Hyderabad Campus,  
Jawahar Nagar, Kapra Mandal, Telangana, Pin – 500078, India

### Supporting Online Information

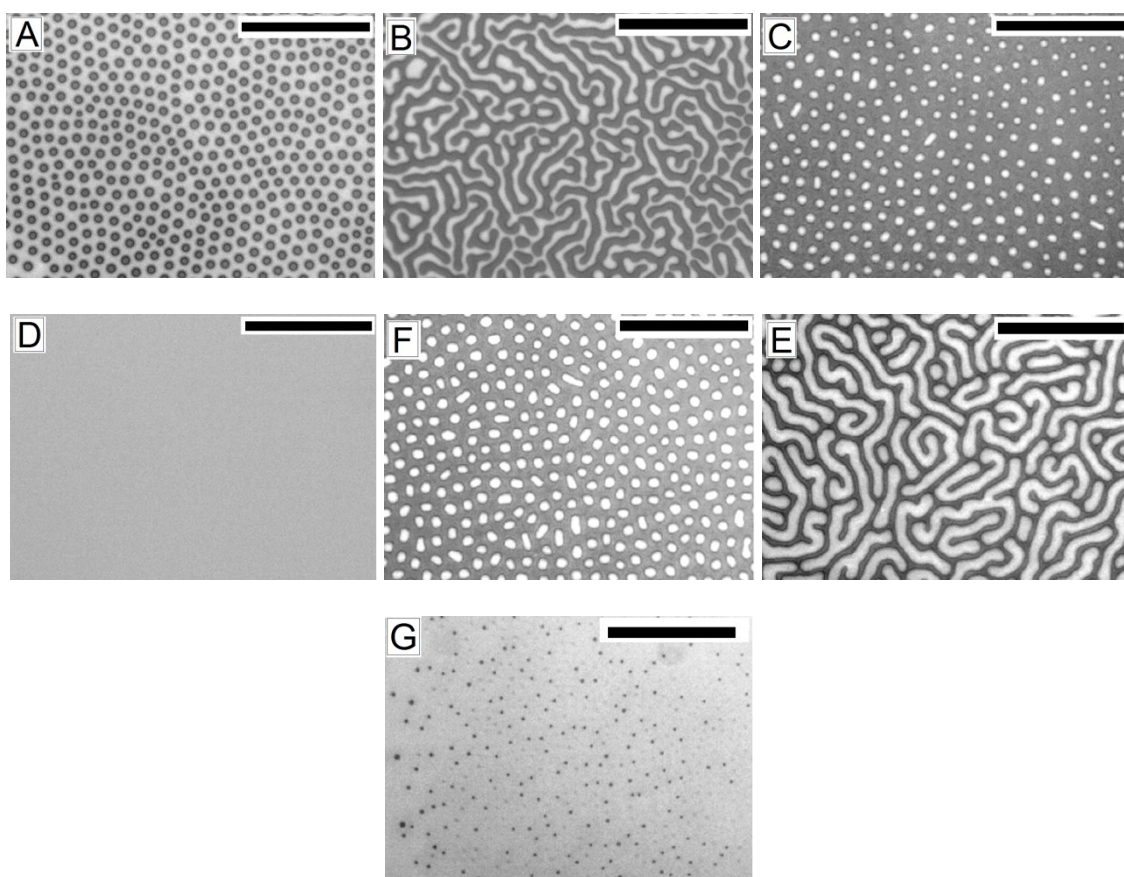

**Figure S1:** Morphological evolution in a thin Sylgard 184 film with  $h_F = 3.91 \mu\text{m}$ ,  $d_G = 800 \text{ nm}$  and  $\mu = 0.12 \text{ MPa}$  when the applied electric field is suddenly increased to  $160 \text{ V}$  (frames A–D) and decreased (frames E–G) at a rate of  $50 \text{ V / min}$ . With gradual increase in applied field, (A) Onset of instability with hexagonally arranged columns; (B) transition to bi-continuous labyrinths; (C) transition to holes or pits and (D) complete conformal contact between the film and the contactor. With gradual reduction of applied voltage (E) appearance of holes; (F) transition of morphology to labyrinths; (G) tiny columns before complete detachment which leads to a flat film again. Scale bar in all frames is  $100 \mu\text{m}$ .
